# Supplementary material for: Design, Synthesis, and Evaluation of Near-Infrared Fluorescent Molecules Based on 4H-1-Benzopyran Core
Source: MDPI journal article supplement (doi:10.3390/molecules26226986), 2021-11-19
Supplement: s1 [file s1]

## Supporting Information

Design, Synthesis, and Evaluation of Near-infrared Fluorescent Molecules

Based on 4H-1-Benzopyran Core

Shuting Wang <sup>1,2,†</sup>, Shulei Zhu <sup>1,†</sup>, Yawen Tanzeng <sup>3</sup>, Yuexing Zhang <sup>4</sup>, Chuchu Li <sup>1</sup>,  
Mingliang Ma <sup>1,2,\*</sup>, Wei Lu <sup>1</sup>

<sup>1</sup>Shanghai Engineering Research Center of Molecular Therapeutics and New Drug Development, School of Chemistry and Molecular Engineering, East China Normal University, Shanghai 200062, China.

<sup>2</sup>School of Ecological and Environmental Sciences, East China Normal University, Shanghai 200241, China

<sup>3</sup>Key Laboratory of Brain Functional Genomics-Ministry of Education, School of Life Science, East China Normal University, Shanghai 200062, China.

<sup>4</sup>Collaborative Innovation Center for Advanced Organic Chemical Materials Co-constructed by the Province and Ministry, Ministry of Education Key Laboratory for the Synthesis and Application of Organic Functional Molecules, College of Chemistry and Chemical Engineering, Hubei University, Wuhan 430062, PR China

\*Corresponding authors.

†These authors contribute to the paper equally.

# Content

|                                                                        |    |
|------------------------------------------------------------------------|----|
| 1. $^1\text{H}$ NMR and $^{13}\text{C}$ NMR spectra for M series ..... | 2  |
| 2. HR-MS Data .....                                                    | 8  |
| 3. HPLC spectra assessment of purity .....                             | 10 |
| 4. UV absorption spectrum and fluorescence spectrum .....              | 11 |
| 5. Supporting table data .....                                         | 12 |
| 6. Optimized geometry and xyz coordinates.....                         | 14 |

# 1. $^1\text{H}$ NMR and $^{13}\text{C}$ NMR spectra for M series

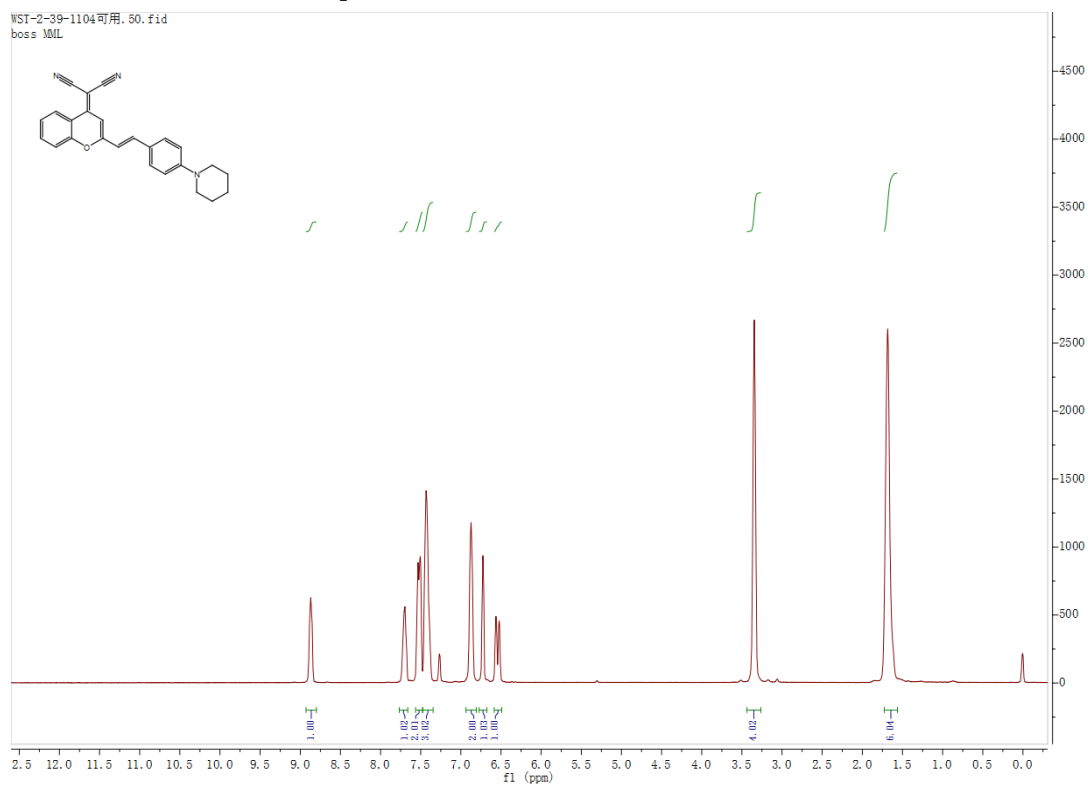

**Figure S1.**  $^1\text{H}$  NMR (400 MHz) of **M-1** in  $\text{CDCl}_3$

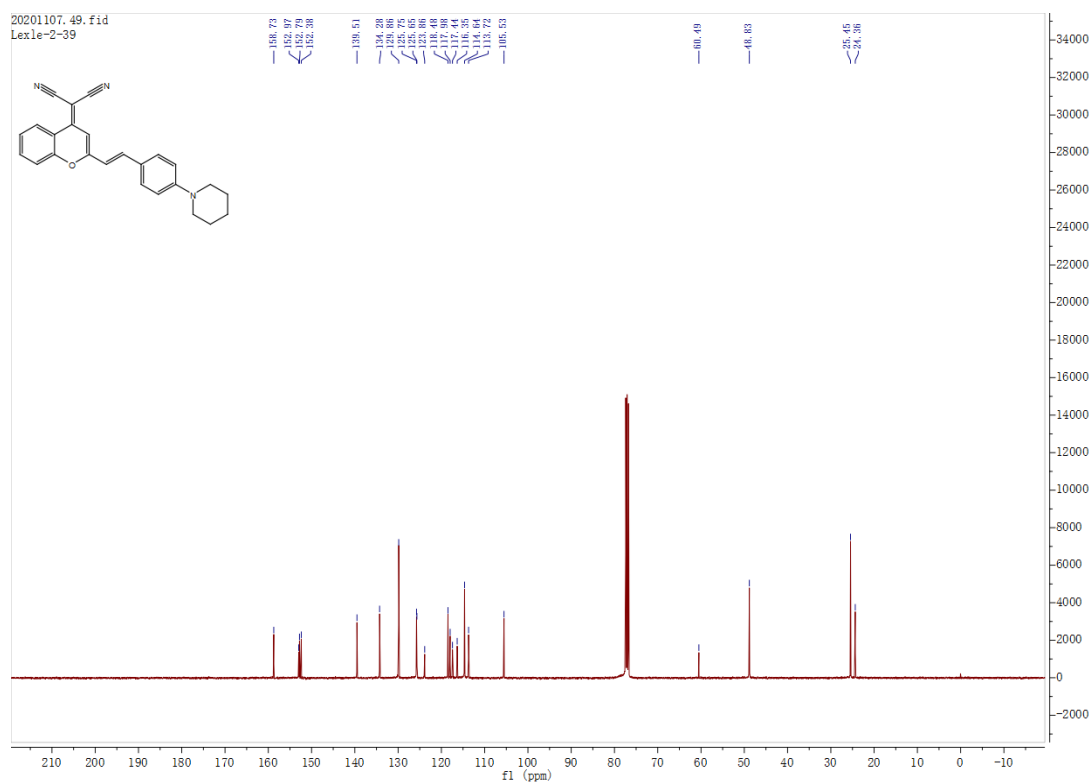

$^{13}\text{C}$  NMR (101 MHz, Chloroform- $d$ )  $\delta$  158.7, 153.0, 152.8, 152.4, 139.5, 134.3, 129.9, 125.7, 123.9, 118.5, 118.0, 117.4, 116.4, 114.6, 113.7, 105.5

**Figure S2.**  $^{13}\text{C}$  NMR (400 MHz) of **M-1** in  $\text{CDCl}_3$

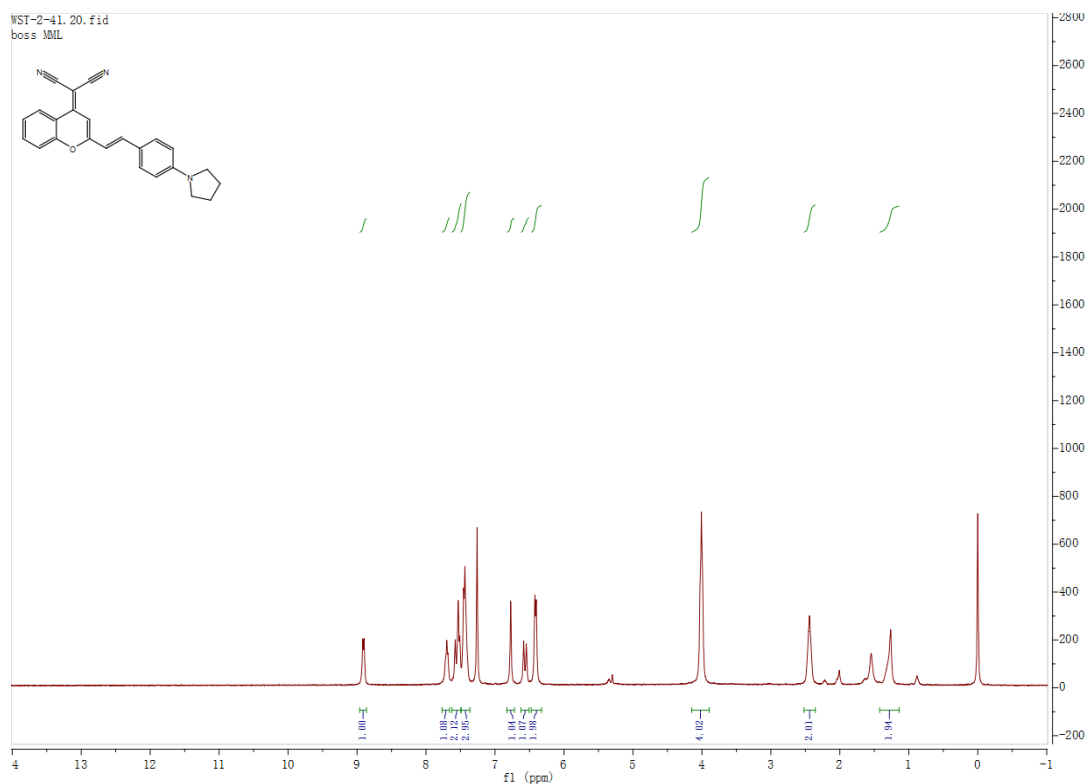

**Figure S3.** <sup>1</sup>H NMR (400 MHz) of **M-2** in CDCl<sub>3</sub>

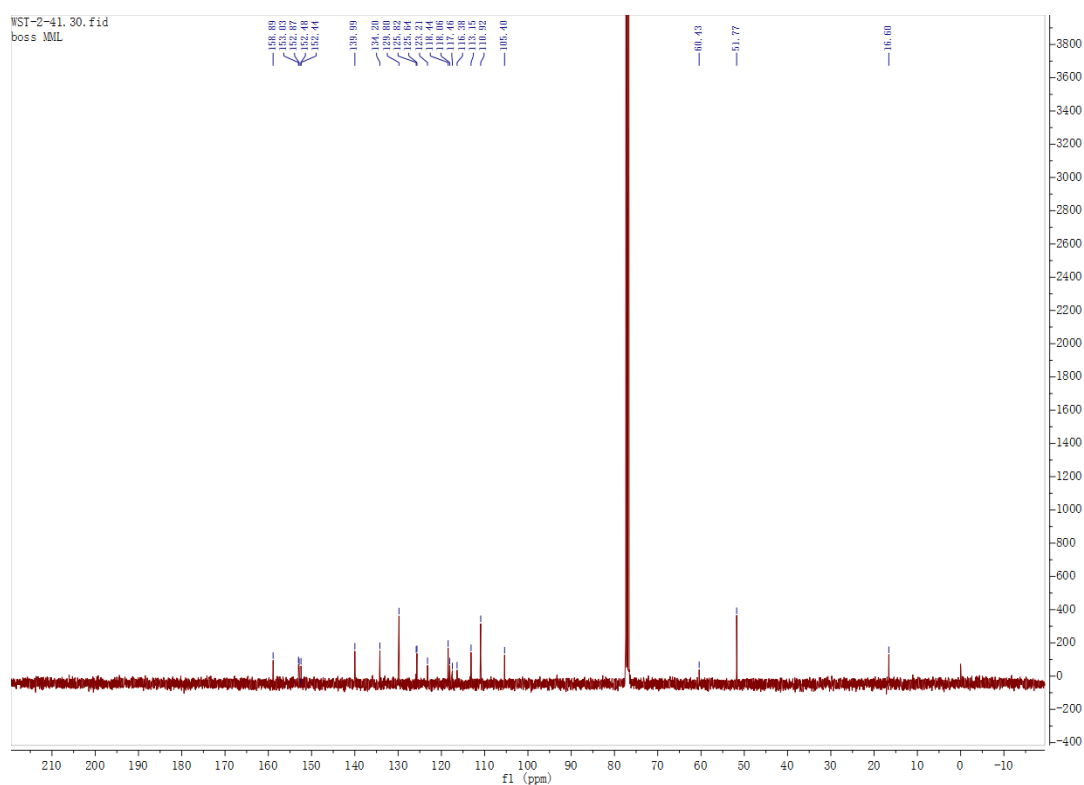

$^{13}\text{C}$  NMR (101 MHz, Chloroform- $d$ )  $\delta$  158.9, 153.0, 152.9, 152.4, 140.0, 134.2, 129.8, 125.8, 125.6, 123.2, 118.4, 118.1, 117.5, 116.4, 113.2, 110.9, 105.4, 60.4, 51.8, 16.6.

**Figure S4.**  $^{13}\text{C}$  NMR (400 MHz) of **M-2** in  $\text{CDCl}_3$

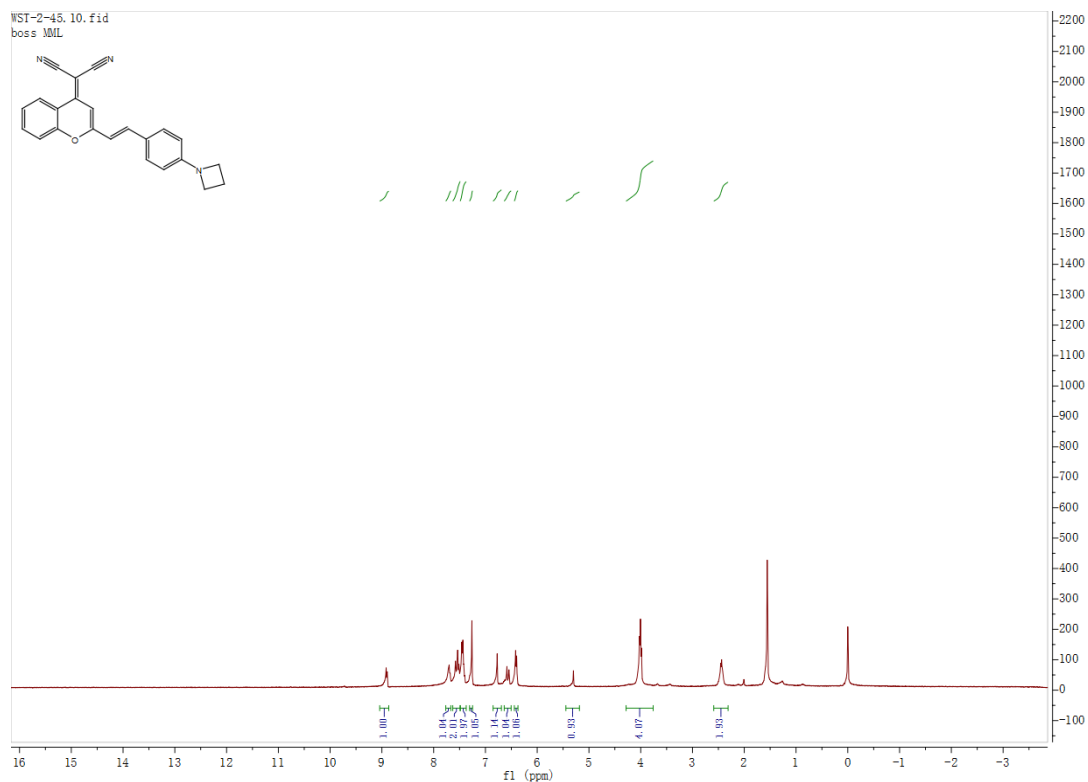

$^1\text{H}$  NMR (400 MHz, Chloroform- $d$ )  $\delta$  8.91 (d,  $J$  = 8.6 Hz, 1H), 7.85 – 7.64 (m, 1H), 7.63 – 7.50 (m, 2H), 7.45 (d,  $J$  = 8.2 Hz, 2H), 7.26 (d,  $J$  = 1.7 Hz, 1H), 6.77 (s, 1H), 6.57 (d,  $J$  = 15.8 Hz, 1H), 6.41 (d,  $J$  = 8.3 Hz, 1H), 5.30 (s, 1H), 4.26 – 3.74 (m, 4H), 2.59 – 2.33 (m, 2H).

**Figure S5.**  $^1\text{H}$  NMR (400 MHz) of **M-3** in  $\text{CDCl}_3$

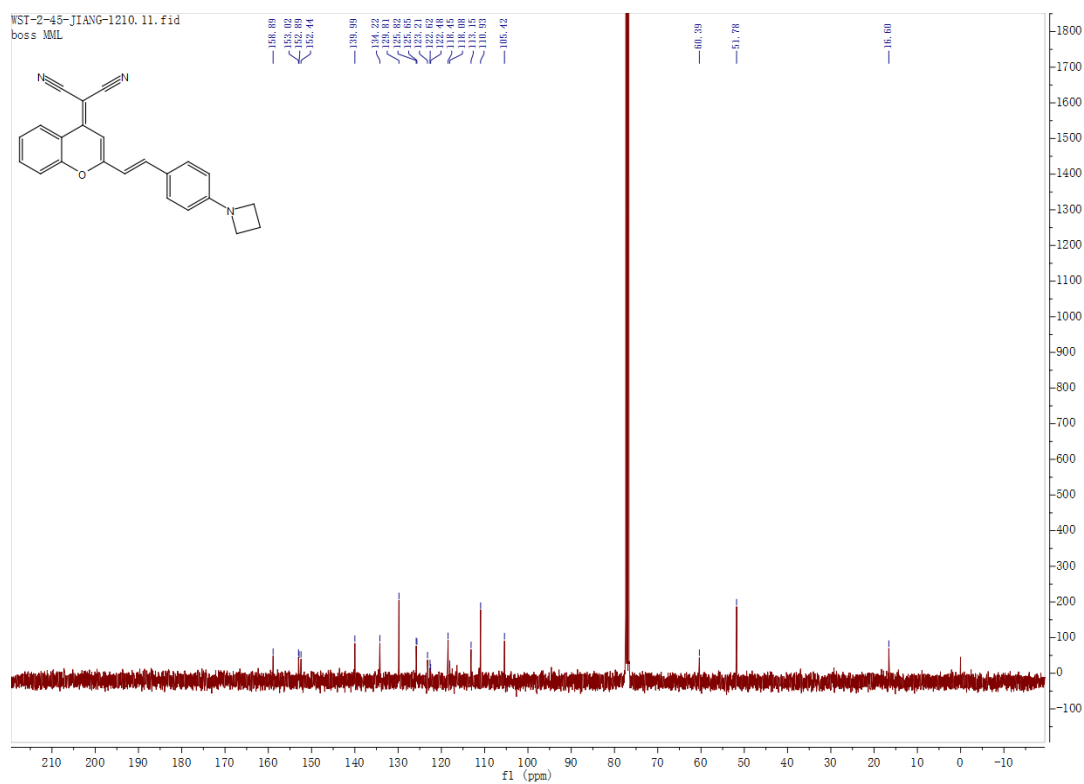

<sup>13</sup>C NMR (400 MHz, Chloroform-d)  $\delta$  140.0, 134.2, 129.8, 125.8, 125.7, 123.2, 122.6, 118.5, 113.2, 110.9, 105.4, 60.4, 51.8, 16.6.

**Figure S6.** <sup>13</sup>C NMR (400 MHz) of **M-3** in CDCl<sub>3</sub>



## 2. HR-MS Data for M series

### Elemental Composition Report

Page 1

#### Single Mass Analysis

Tolerance = 500.0 mDa / DBE: min = -1.5, max = 50.0

Element prediction: Off

Monoisotopic Mass, Even Electron Ions

3 formula(e) evaluated with 1 results within limits (up to 50 closest results for each mass)

Elements Used:

C: 25-25 H: 11-54 N: 3-3 O: 1-1 Na: 0-1 I: 0-1

Default file

WST-2-39 41 (0.832)

1: TOF MS ES+  
3.62e+002

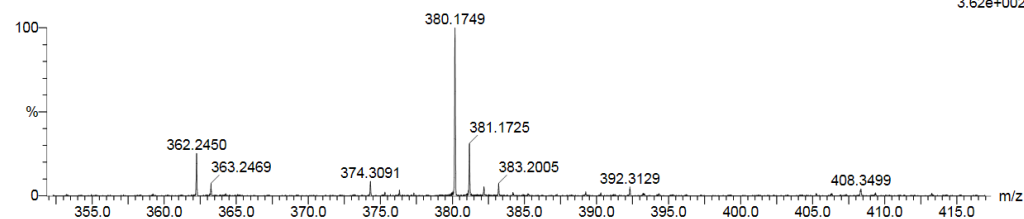

| Minimum: |            |      |      | -1.5 |              |
|----------|------------|------|------|------|--------------|
| Maximum: | 500.0      | 10.0 |      | 50.0 |              |
| Mass     | Calc. Mass | mDa  | PPM  | DBE  | Formula      |
| 380.1749 | 380.1763   | -1.4 | -3.7 | 16.5 | C25 H22 N3 O |

Figure S7. The HR-MS spectrum of M-1

### Elemental Composition Report

Page 1

#### Single Mass Analysis

Tolerance = 500.0 mDa / DBE: min = -1.5, max = 50.0

Element prediction: Off

Monoisotopic Mass, Even Electron Ions

3 formula(e) evaluated with 1 results within limits (up to 50 closest results for each mass)

Elements Used:

C: 24-24 H: 11-54 N: 3-3 O: 1-1 Na: 0-1 I: 0-1

WST-2-41 26 (0.537) Cm (25.62)

1: TOF MS ES+

1.30e+003

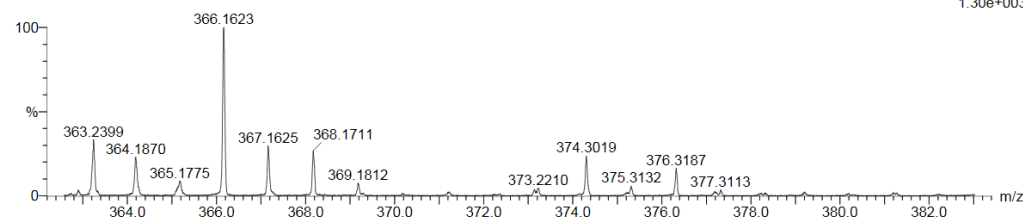

| Minimum: |            |      |     | -1.5 |              |
|----------|------------|------|-----|------|--------------|
| Maximum: | 500.0      | 10.0 |     | 50.0 |              |
| Mass     | Calc. Mass | mDa  | PPM | DBE  | Formula      |
| 366.1623 | 366.1606   | 1.7  | 4.6 | 16.5 | C24 H20 N3 O |

Figure S8. The HR-MS spectrum of M-2

## Single Mass Analysis

Tolerance = 500.0 mDa / DBE: min = -1.5, max = 50.0

Element prediction: Off

Monoisotopic Mass, Even Electron Ions

3 formula(e) evaluated with 1 results within limits (up to 50 closest results for each mass)

Elements Used:

C: 23-25 H: 11-54 N: 3-3 O: 1-1 Na: 0-1 I: 0-1

WST-2-45A 37 (0.744)

1: TOF MS ES+

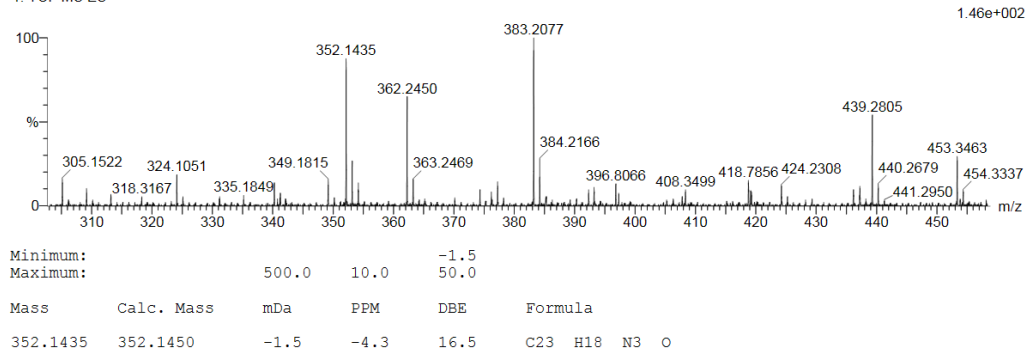

Figure S9. The HR-MS spectrum of M-3

3. HPLC spectra assessment of purity for M series

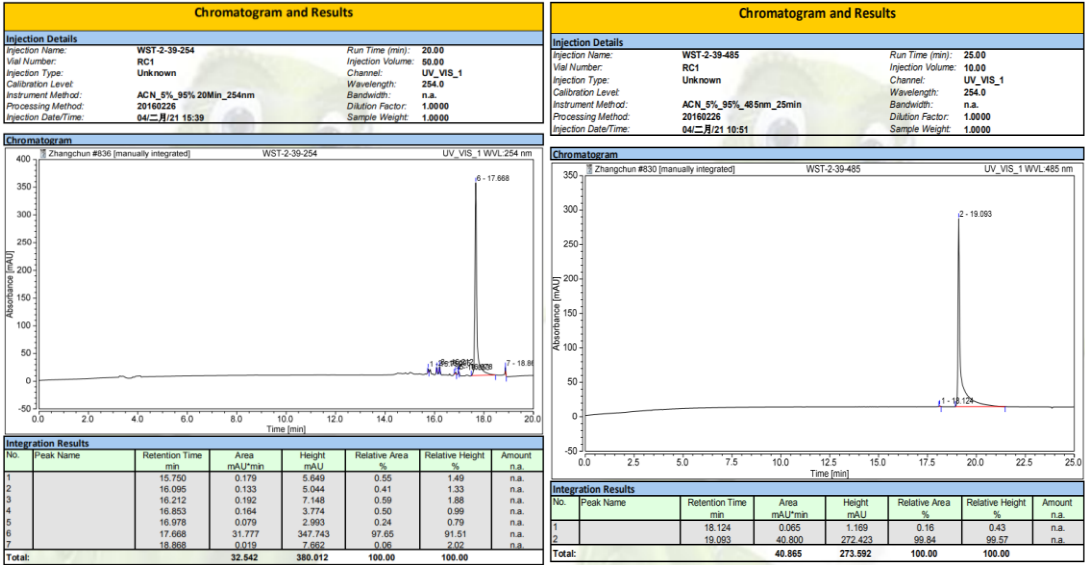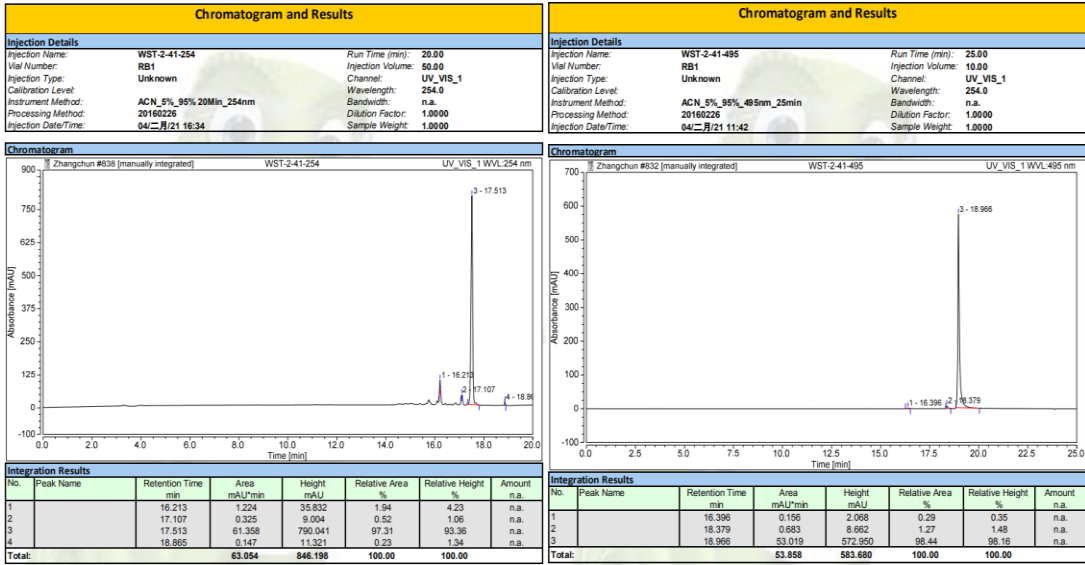

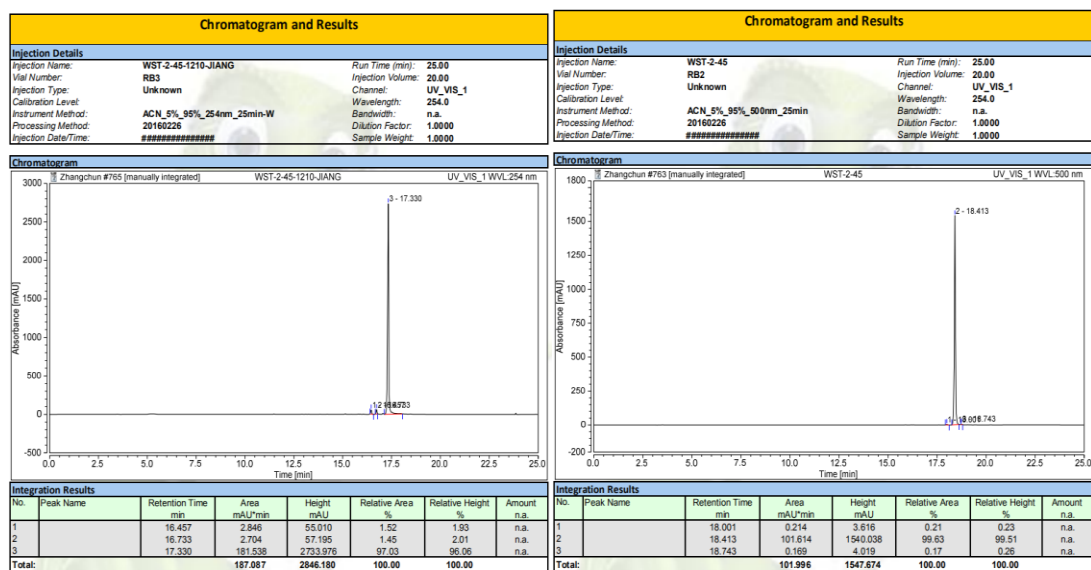

Figure S12. The HPLC spectrum of M-3 under 254nm and 500nm

#### 4. UV absorption spectrum and fluorescence spectrum for M series

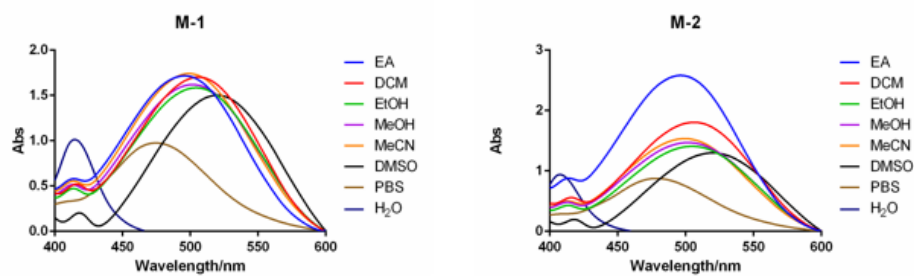

Figure S13. UV absorption spectrum of 50uM M-1 and M-2 in different solvent

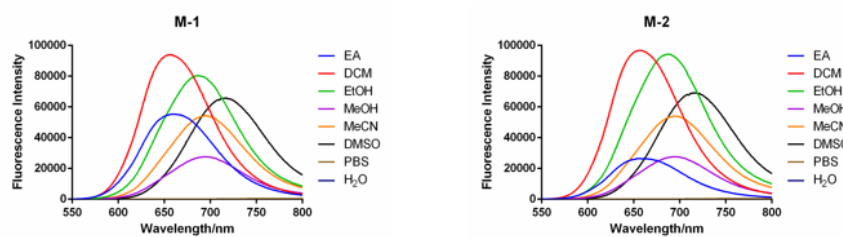

Figure S14. Fluorescence emission spectrum of 50uM M-1 and M-2 in different solvent

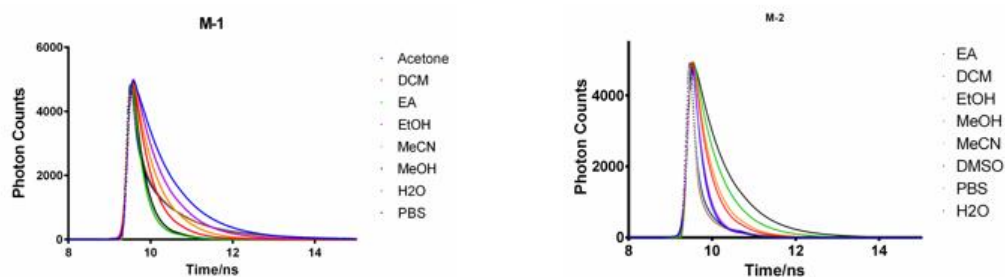

**Figure S15.** The fluorescence decays of **M-1** and **M-2** in different solvent

## 5. Supporting table data

**Table S1.** M-1 spectrum data

| Solvent          | $\lambda_b^a$ (nm) | $\lambda_c^a$ (nm) | $\Delta\lambda$ (nm) | $Q_{Ein}$ | AF     |
|------------------|--------------------|--------------------|----------------------|-----------|--------|
| EA               | 495                | 660                | 165                  | 0.0401    | 0.5037 |
| DCM              | 506                | 655                | 149                  | 0.0512    | 0.2343 |
| EtOH             | 504                | 687                | 183                  | 0.0437    | 0.2661 |
| MeOH             | 501                | 695                | 194                  | 0.0141    | 0.3254 |
| MeCN             | 498                | 693                | 195                  | 0.0306    | 0.4139 |
| DMSO             | 522                | 718                | 196                  | 0.0412    | 0.4600 |
| H <sub>2</sub> O | 474                | 781                | 307                  | N         | N      |
| PBS              | 422                | 788                | 366                  | N         | N      |

<sup>a</sup> maximum

<sup>b</sup> absorption

<sup>c</sup> emission

**Table S2.** M-2 spectrum data

| Solvent          | $\lambda_b^a$ (nm) | $\lambda_c^a$ (nm) | $\Delta\lambda$ (nm) | $Q_{Ein}$ | AF     |
|------------------|--------------------|--------------------|----------------------|-----------|--------|
| EA               | 496                | 656                | 160                  | 0.0390    | 0.3890 |
| DCM              | 506                | 655                | 149                  | 0.0480    | 0.2999 |
| EtOH             | 504                | 689                | 185                  | 0.0364    | 0.4157 |
| MeOH             | 502                | 695                | 193                  | 0.0140    | 0.5711 |
| MeCN             | 499                | 693                | 194                  | 0.0267    | 0.5376 |
| DMSO             | 519                | 711                | 192                  | 0.0387    | 0.4623 |
| H <sub>2</sub> O | 478                | 781                | 303                  | N         | N      |
| PBS              | 469                | 794                | 325                  | N         | N      |

<sup>a</sup> maximum

<sup>b</sup> absorption

<sup>c</sup> emission

**Table S3.** M-1 average lifetime in different solvents

| M-1     | Average Lifetime (ns) | Chisqr  |
|---------|-----------------------|---------|
| Acetone | 0.82612               | 1.08153 |
| DCM     | 0.42287               | 1.09183 |

|                  |         |         |
|------------------|---------|---------|
| EA               | 0.24170 | 0.78509 |
| EtOH             | 0.66948 | 1.02223 |
| H <sub>2</sub> O | 0.93379 | 1.12571 |
| MeCN             | 0.51774 | 1.03802 |
| MeOH             | 0.27311 | 0.71691 |
| PBS              | 0.98113 | 1.10881 |

**Table S4. M-2 average lifetime in different solvents**

| <b>M-2</b>       | Average Lifetime (ns) | Chisqr  |
|------------------|-----------------------|---------|
| Acetone          | 0.73869               | 1.045   |
| DCM              | 0.41942               | 1.08201 |
| EA               | 0.23657               | 0.97067 |
| EtOH             | 0.57178               | 1.06442 |
| H <sub>2</sub> O | 0.24525               | 1.06974 |
| MeCN             | 0.42679               | 0.89964 |
| MeOH             | 0.2488                | 0.81336 |
| PBS              | 0.37446               | 1.03882 |

**Table S5. M-3 average lifetime in different solvents**

| <b>M-3</b>       | Average Lifetime (ns) | Chisqr  |
|------------------|-----------------------|---------|
| DCM              | 0.40738               | 0.96977 |
| EA               | 0.29433               | 0.91535 |
| EtOH             | 0.58272               | 1.00478 |
| MeOH             | 0.2565                | 0.88928 |
| MeCN             | 0.43155               | 0.96132 |
| H <sub>2</sub> O | 0.45366               | 1.17758 |
| PBS              | 0.39437               | 1.03882 |

**Table S6. M-1~3 average lifetime in BSA**

| in BSA     | Average Lifetime (ns) | Chisqr  |
|------------|-----------------------|---------|
| <b>M-1</b> | 2.18788               | 1.03131 |
| <b>M-2</b> | 2.05296               | 1.01324 |
| <b>M-3</b> | 2.33991               | 0.98738 |

**Table S7. M-3 average lifetime in PEG**

| <b>M-3</b> | Average Lifetime (ns) | Chisqr  |
|------------|-----------------------|---------|
| PEG0       | 0.59973               | 1.06925 |
| PEG10      | 0.65729               | 1.03483 |
| PEG20      | 0.7109                | 1.0342  |
| PEG30      | 0.76625               | 1.14293 |
| PEG40      | 0.79901               | 1.10521 |
| PEG50      | 0.87558               | 1.08563 |

|        |         |         |
|--------|---------|---------|
| PEG60  | 0.95043 | 1.11962 |
| PEG70  | 1.13675 | 1.0369  |
| PEG80  | 1.16695 | 1.07749 |
| PEG90  | 1.30254 | 1.10788 |
| PEG100 | 1.40621 | 1.03194 |

## 6. Optimized geometry and xyz coordinates

Optimized geometry of **M-1**, **M-2**, **M-3** were zipped as " M-1-3\_ES\_GS\_MOL-SI.zip" which would be uploaded independently.

**Table S8.** The xyz coordinates of the optimized geometry at B3LYP/6-31g(d,p)-IEFPCM(water) level of all molecules in both ground (GS) and first excited states (ES).

| M-1 GS |             |             |             | M-1 ES |             |             |             |
|--------|-------------|-------------|-------------|--------|-------------|-------------|-------------|
| C      | -5.54646391 | -2.61796792 | 0.04185830  | C      | -5.61839545 | -2.56849203 | -0.00106831 |
| C      | -4.45223931 | -3.49423821 | 0.03150290  | C      | -4.55603701 | -3.47612169 | -0.00067392 |
| C      | -3.16234353 | -2.98636129 | 0.01291842  | C      | -3.24640837 | -2.99682792 | -0.00023220 |
| C      | -2.97246922 | -1.60277774 | 0.00488969  | C      | -3.01150046 | -1.62515879 | -0.00012643 |
| C      | -4.04903972 | -0.68723982 | 0.01526577  | C      | -4.06460069 | -0.67006272 | -0.00037416 |
| C      | -5.34696086 | -1.24577988 | 0.03388245  | C      | -5.37752228 | -1.19810460 | -0.00093793 |
| O      | -1.66475877 | -1.20166699 | -0.01385671 | O      | -1.68440657 | -1.26431559 | 0.00020380  |
| C      | -1.35524748 | 0.11827234  | -0.02402662 | C      | -1.34953494 | 0.06757218  | -0.00011761 |
| C      | -2.35406052 | 1.06824492  | -0.01485703 | C      | -2.32889686 | 1.03559255  | -0.00029272 |
| C      | -3.73343825 | 0.74550506  | 0.00580026  | C      | -3.71837861 | 0.74435130  | -0.00018351 |
| C      | -4.67803637 | 1.79812945  | 0.01582591  | C      | -4.64429496 | 1.84573595  | 0.00008845  |
| C      | 0.04167560  | 0.42531372  | -0.04350770 | C      | 0.05172659  | 0.34173321  | -0.00010213 |
| C      | 1.02973903  | -0.51621385 | -0.04967831 | C      | 1.03803212  | -0.61430535 | 0.00027747  |
| C      | 2.45298287  | -0.29815985 | -0.06745481 | C      | 2.45909327  | -0.36590853 | 0.00028530  |
| C      | 3.31993679  | -1.41774069 | -0.07057653 | C      | 3.35226956  | -1.47436715 | 0.00104294  |
| C      | 4.69472961  | -1.28253030 | -0.08563717 | C      | 4.71933067  | -1.31155609 | 0.00110648  |
| C      | 5.28368444  | 0.00762736  | -0.09914486 | C      | 5.28079161  | -0.00148580 | 0.00038985  |
| C      | 4.42609929  | 1.14173263  | -0.09692566 | C      | 4.40133561  | 1.12138454  | -0.00037978 |
| C      | 3.05578426  | 0.98509222  | -0.08135126 | C      | 3.03779352  | 0.93707678  | -0.00043538 |
| N      | 6.62870711  | 0.15876890  | -0.13057940 | N      | 6.61445298  | 0.17288527  | 0.00045199  |
| C      | 7.47251056  | 1.34062651  | 0.08789605  | C      | 7.46022370  | 1.37311124  | -0.00074696 |
| C      | 8.69356235  | 0.38944377  | 0.22667810  | C      | 8.70639098  | 0.44683250  | -0.00070424 |
| C      | 7.71098899  | -0.80726175 | 0.09539710  | C      | 7.74085010  | -0.76928249 | 0.00053718  |
| C      | -4.23141954 | 3.14905850  | 0.00458440  | C      | -4.16125392 | 3.17662813  | -0.00054455 |
| N      | -3.87399638 | 4.26098212  | -0.00441235 | N      | -3.76520629 | 4.27953013  | -0.00110016 |
| C      | -6.09076896 | 1.68293517  | 0.03768699  | C      | -6.05381445 | 1.77414575  | 0.00138275  |
| N      | -7.25948274 | 1.66850602  | 0.05554063  | N      | -7.22671074 | 1.79019293  | 0.00267815  |
| H      | -6.55745419 | -3.01073398 | 0.05617283  | H      | -6.64249980 | -2.92825365 | -0.00150098 |
| H      | -4.60902314 | -4.56779849 | 0.03783045  | H      | -4.74067275 | -4.54532458 | -0.00075142 |
| H      | -2.29091251 | -3.63132954 | 0.00426481  | H      | -2.39395555 | -3.66757380 | 0.00000294  |
| H      | -6.21072551 | -0.59792327 | 0.04209250  | H      | -6.22200116 | -0.52450465 | -0.00131646 |

|               |             |             |             |               |             |             |             |
|---------------|-------------|-------------|-------------|---------------|-------------|-------------|-------------|
| H             | -2.04500197 | 2.10561400  | -0.02339613 | H             | -1.99717196 | 2.06731393  | -0.00044332 |
| H             | 0.27281576  | 1.48517293  | -0.05265065 | H             | 0.30265137  | 1.39767189  | -0.00038359 |
| H             | 0.72089296  | -1.55938460 | -0.03977912 | H             | 0.73482987  | -1.65704630 | 0.00062785  |
| H             | 2.88788834  | -2.41507389 | -0.05909581 | H             | 2.93778474  | -2.47801734 | 0.00159280  |
| H             | 5.32929232  | -2.16243468 | -0.08882166 | H             | 5.37385063  | -2.17609171 | 0.00168907  |
| H             | 4.85813783  | 2.13693595  | -0.10901130 | H             | 4.81572884  | 2.12361210  | -0.00094718 |
| H             | 2.43392963  | 1.87491835  | -0.07836023 | H             | 2.39822887  | 1.81267949  | -0.00107749 |
| H             | 7.21384321  | 1.89811562  | 0.99694275  | H             | 7.32557994  | 1.99580367  | 0.89105627  |
| H             | 7.49601307  | 2.03555122  | -0.75898988 | H             | 7.32472881  | 1.99458089  | -0.89327315 |
| H             | 9.41295103  | 0.46659655  | -0.58928511 | H             | 9.32769555  | 0.52760737  | -0.89224957 |
| H             | 9.21713503  | 0.45093607  | 1.18081981  | H             | 9.32855732  | 0.52879441  | 0.89013029  |
| H             | 7.57980262  | -1.40149658 | 1.00857831  | H             | 7.77091424  | -1.40439419 | 0.89324287  |
| H             | 7.88665298  | -1.48639113 | -0.74645863 | H             | 7.77005322  | -1.40553691 | -0.89138259 |
| <b>M-2 GS</b> |             |             |             | <b>M-2 ES</b> |             |             |             |
| C             | -5.93194509 | -2.59737370 | -0.02967378 | C             | -6.00574293 | -2.54190564 | -0.02020854 |
| C             | -4.84366008 | -3.48099020 | -0.03714264 | C             | -4.95151251 | -3.45885713 | -0.03061751 |
| C             | -3.55019682 | -2.98187902 | -0.03090375 | C             | -3.63768796 | -2.99130008 | -0.02855468 |
| C             | -3.35090007 | -1.59968515 | -0.01698736 | C             | -3.39047715 | -1.62181219 | -0.01613100 |
| C             | -4.42128907 | -0.67690848 | -0.00831686 | C             | -4.43507225 | -0.65754407 | -0.00510011 |
| C             | -5.72306571 | -1.22660311 | -0.01561207 | C             | -5.75255877 | -1.17376280 | -0.00782288 |
| O             | -2.04031487 | -1.20744741 | -0.01265843 | O             | -2.06026852 | -1.27286613 | -0.01532292 |
| C             | -1.72177064 | 0.11038553  | -0.00132582 | C             | -1.71359981 | 0.05598816  | -0.00435375 |
| C             | -2.71434815 | 1.06705500  | 0.00759425  | C             | -2.68455321 | 1.03267066  | 0.00642921  |
| C             | -4.09588895 | 0.75362165  | 0.00659770  | C             | -4.07626970 | 0.75391006  | 0.00748621  |
| C             | -5.03362310 | 1.81249498  | 0.01993601  | C             | -4.99242013 | 1.86343324  | 0.02077806  |
| C             | -0.32286931 | 0.40806997  | 0.00115549  | C             | -0.31029122 | 0.31821408  | -0.00396540 |
| C             | 0.65940079  | -0.53967291 | -0.00473677 | C             | 0.66873513  | -0.64512829 | -0.01353585 |
| C             | 2.08358002  | -0.32935464 | -0.00235405 | C             | 2.09140874  | -0.40487562 | -0.01127894 |
| C             | 2.94705174  | -1.45022872 | -0.00803856 | C             | 2.98093350  | -1.51418758 | -0.02190772 |
| C             | 4.32258204  | -1.32207440 | -0.00655683 | C             | 4.34914810  | -1.35742588 | -0.01794317 |
| C             | 4.93008802  | -0.03660217 | 0.00098615  | C             | 4.92910539  | -0.05294160 | -0.00465160 |
| C             | 4.06718384  | 1.09782207  | 0.00756383  | C             | 4.04460220  | 1.06879444  | 0.00402115  |
| C             | 2.69600227  | 0.94817853  | 0.00576312  | C             | 2.67967079  | 0.89200089  | 0.00189063  |
| N             | 6.28184360  | 0.10781918  | 0.00272340  | N             | 6.27374232  | 0.11557034  | 0.00015553  |
| C             | 6.97035305  | 1.40364170  | -0.08652182 | C             | 6.94271518  | 1.42530624  | -0.08226097 |
| C             | 8.43235770  | 1.02022731  | -0.35094598 | C             | 8.41299072  | 1.07220249  | -0.33625535 |
| C             | 8.57572907  | -0.33877521 | 0.35075243  | C             | 8.57824166  | -0.28445314 | 0.36396566  |
| C             | 7.22420604  | -1.01666326 | 0.08987355  | C             | 7.24429916  | -0.98886929 | 0.09011463  |
| C             | -4.57781944 | 3.16030766  | 0.03246454  | C             | -4.49755702 | 3.18988977  | 0.03023831  |
| N             | -4.21269943 | 4.26972929  | 0.04266533  | N             | -4.09161831 | 4.28916164  | 0.03798575  |
| C             | -6.44719048 | 1.70658818  | 0.02454937  | C             | -6.40248103 | 1.80423533  | 0.02699277  |
| N             | -7.61611222 | 1.69968248  | 0.02952628  | N             | -7.57518211 | 1.83026612  | 0.03313158  |
| H             | -6.94568434 | -2.98323072 | -0.03499348 | H             | -7.03303600 | -2.89244195 | -0.02182562 |
| H             | -5.00778610 | -4.55341889 | -0.04802354 | H             | -5.14564737 | -4.52633498 | -0.04031265 |



|               |             |             |             |               |             |             |             |
|---------------|-------------|-------------|-------------|---------------|-------------|-------------|-------------|
| H             | -2.68312652 | -3.63272806 | -0.03673418 | H             | -2.79129054 | -3.66961950 | -0.03648555 |
| H             | -6.58249597 | -0.57297324 | -0.01047510 | H             | -6.59101154 | -0.49270834 | -0.00016595 |
| H             | -2.39823074 | 2.10228922  | 0.01711542  | H             | -2.34377182 | 2.06141346  | 0.01496319  |
| H             | -0.08440779 | 1.46632713  | 0.00873595  | H             | -0.05056756 | 1.37200053  | 0.00531499  |
| H             | 0.34444523  | -1.58106632 | -0.01176541 | H             | 0.35888140  | -1.68586924 | -0.02285131 |
| H             | 2.51287127  | -2.44673762 | -0.01789918 | H             | 2.56504011  | -2.51717936 | -0.03702811 |
| H             | 4.93881180  | -2.21267621 | -0.02259980 | H             | 4.98547786  | -2.23315272 | -0.03807544 |
| H             | 4.48938104  | 2.09524562  | 0.02540751  | H             | 4.44804260  | 2.07334849  | 0.02617839  |
| H             | 2.08140506  | 1.84308672  | 0.01499669  | H             | 2.04772449  | 1.77307057  | 0.01490583  |
| H             | 6.86378887  | 1.96472736  | 0.85271303  | H             | 6.81302495  | 1.96778022  | 0.86429538  |
| H             | 6.54792011  | 2.01477901  | -0.89073952 | H             | 6.50382372  | 2.02922312  | -0.88154531 |
| H             | 8.59852682  | 0.90906999  | -1.42777985 | H             | 8.59086428  | 0.97062223  | -1.41162032 |
| H             | 9.12907374  | 1.77441705  | 0.02203300  | H             | 9.08674358  | 1.84046804  | 0.04833578  |
| H             | 8.71817544  | -0.19551195 | 1.42718640  | H             | 8.71045395  | -0.14410544 | 1.44154810  |
| H             | 9.41269391  | -0.93211379 | -0.02443773 | H             | 9.42609040  | -0.86182512 | -0.01001727 |
| H             | 7.23328815  | -1.58793938 | -0.84929721 | H             | 7.26489665  | -1.54231023 | -0.85865429 |
| H             | 6.93883916  | -1.70207283 | 0.89469838  | H             | 6.95805491  | -1.68592970 | 0.88273859  |
| <b>M-3 GS</b> |             |             |             | <b>M-3 ES</b> |             |             |             |
| C             | -6.17428366 | -2.63836586 | 0.22886172  | C             | -6.30536425 | -2.56807461 | 0.18372647  |
| C             | -5.07614688 | -3.50843966 | 0.17941413  | C             | -5.24483665 | -3.47754108 | 0.16206091  |
| C             | -3.79230425 | -2.99371566 | 0.08535955  | C             | -3.93585541 | -3.00097251 | 0.09666900  |
| C             | -3.61233087 | -1.60947585 | 0.04158300  | C             | -3.69964473 | -1.63015286 | 0.05420663  |
| C             | -4.69303027 | -0.69999455 | 0.09024782  | C             | -4.75092320 | -0.67323246 | 0.07538287  |
| C             | -5.98463712 | -1.26549701 | 0.18504290  | C             | -6.06323529 | -1.19854421 | 0.14122147  |
| O             | -2.30997289 | -1.20142565 | -0.05176237 | O             | -2.37334777 | -1.27211857 | -0.00950610 |
| C             | -2.01047295 | 0.11971144  | -0.10276020 | C             | -2.03825880 | 0.05872344  | -0.06151334 |
| C             | -3.01331936 | 1.06402166  | -0.06041781 | C             | -3.01525614 | 1.02814226  | -0.04315035 |
| C             | -4.38788550 | 0.73399076  | 0.03844312  | C             | -4.40372662 | 0.74024864  | 0.02752949  |
| C             | -5.33709747 | 1.78136091  | 0.07957257  | C             | -5.32747941 | 1.84316152  | 0.04492501  |
| C             | -0.61789478 | 0.43415497  | -0.19868135 | C             | -0.63765592 | 0.33029560  | -0.13522605 |
| C             | 0.37484798  | -0.50110632 | -0.23477599 | C             | 0.34830225  | -0.62388496 | -0.14898639 |
| C             | 1.79334032  | -0.27135355 | -0.32880878 | C             | 1.76784599  | -0.36913860 | -0.22733020 |
| C             | 2.67539170  | -1.37424920 | -0.34326844 | C             | 2.67409016  | -1.46139668 | -0.19461261 |
| C             | 4.04752319  | -1.22475021 | -0.42587780 | C             | 4.03932550  | -1.28810701 | -0.26673847 |
| C             | 4.64484225  | 0.06306104  | -0.50821561 | C             | 4.61073059  | 0.01655495  | -0.37488784 |
| C             | 3.75474881  | 1.17729474  | -0.49205835 | C             | 3.70184308  | 1.11886359  | -0.40990832 |
| C             | 2.38832702  | 1.01074146  | -0.40728138 | C             | 2.33995286  | 0.92756216  | -0.34096199 |
| N             | 6.00461340  | 0.23189447  | -0.63746509 | N             | 5.96406488  | 0.20222131  | -0.45144623 |
| C             | 6.93701631  | -0.90004128 | -0.70111420 | C             | 6.91950276  | -0.87781913 | -0.72577197 |
| C             | 7.57977526  | -1.17431295 | 0.66663973  | C             | 7.86361456  | -1.10398529 | 0.46560705  |
| C             | 8.28404668  | 0.09086560  | 1.18279973  | C             | 8.58505069  | 0.20026425  | 0.82856514  |
| C             | 7.34611202  | 1.30743976  | 1.14255073  | C             | 7.58055850  | 1.34175456  | 1.02649313  |
| C             | 6.69766515  | 1.46707339  | -0.24369912 | C             | 6.63100819  | 1.48174129  | -0.18008719 |
| C             | -4.90051583 | 3.13430887  | 0.01825628  | C             | -4.84361059 | 3.17261729  | -0.00988190 |

|   |             |             |             |   |             |             |             |
|---|-------------|-------------|-------------|---|-------------|-------------|-------------|
| N | -4.55156636 | 4.24779190  | -0.03192757 | N | -4.44695962 | 4.27437377  | -0.05535751 |
| C | -6.74575265 | 1.65892157  | 0.18176793  | C | -6.73537067 | 1.77480744  | 0.11610762  |
| N | -7.91150918 | 1.63847443  | 0.26495053  | N | -7.90682532 | 1.79321801  | 0.17379862  |
| H | -7.18060093 | -3.03657508 | 0.30183372  | H | -7.32901150 | -2.92564105 | 0.23390180  |
| H | -5.22524698 | -4.58255107 | 0.21407710  | H | -5.43039238 | -4.54606877 | 0.19525709  |
| H | -2.91815987 | -3.63373652 | 0.04437914  | H | -3.08481967 | -3.67324001 | 0.07732335  |
| H | -6.85120307 | -0.62257070 | 0.22475984  | H | -6.90632270 | -0.52342374 | 0.15904266  |
| H | -2.71193520 | 2.10272644  | -0.10410445 | H | -2.68289161 | 2.05878579  | -0.08574134 |
| H | -0.39404091 | 1.49487748  | -0.24021622 | H | -0.38706754 | 1.38548147  | -0.18002805 |
| H | 0.07616540  | -1.54619492 | -0.18723103 | H | 0.05101768  | -1.66686079 | -0.09367797 |
| H | 2.26385202  | -2.37792290 | -0.27336710 | H | 2.27825616  | -2.46775504 | -0.09549151 |
| H | 4.66102924  | -2.11547008 | -0.40179242 | H | 4.67430102  | -2.16117756 | -0.19717461 |
| H | 4.14051540  | 2.18517491  | -0.57246650 | H | 4.07166514  | 2.12757494  | -0.53590525 |
| H | 1.76425248  | 1.89911417  | -0.41029390 | H | 1.69869778  | 1.80048826  | -0.39348902 |
| H | 6.43742086  | -1.77945044 | -1.10473067 | H | 6.39214763  | -1.78588669 | -1.00658500 |
| H | 7.72011857  | -0.62860463 | -1.42146473 | H | 7.50799480  | -0.56564142 | -1.59997302 |
| H | 6.80085498  | -1.48873667 | 1.37276569  | H | 7.28096168  | -1.46919021 | 1.31977556  |
| H | 8.29063023  | -2.00357193 | 0.57704767  | H | 8.58039266  | -1.88770509 | 0.19870315  |
| H | 8.65863104  | -0.06685199 | 2.20006465  | H | 9.18505180  | 0.06499598  | 1.73457109  |
| H | 9.16080908  | 0.29292418  | 0.55200582  | H | 9.28223124  | 0.46419332  | 0.02218421  |
| H | 6.55044127  | 1.19253411  | 1.88963840  | H | 6.97682631  | 1.16182981  | 1.92402779  |
| H | 7.89270396  | 2.22439801  | 1.39105787  | H | 8.09607403  | 2.29784638  | 1.16689351  |
| H | 6.01470164  | 2.31347662  | -0.25220497 | H | 5.89704204  | 2.25808719  | 0.01714656  |
| H | 7.47028849  | 1.67142628  | -0.99604519 | H | 7.19902355  | 1.77023858  | -1.07430528 |
